# Supplementary material for: Spatiotemporal dynamics of the Liaohe Delta over the past 30 years (1987– 2017) based on an integrated classification and preferred features approach
Source: Research Square preprint supplement (doi:10.21203/rs.3.rs-2229990/v1), 2022-11-08
Supplement: Supplementary file 1 [file b9895bc97713fb890797615f.docx]

| Table 1 Remote sensing image information of the study area | | | | |
| --- | --- | --- | --- | --- |
| Imaging carrier | Sensor | Imaging time | Number of scenes | Spatial resolution (m) |
| Landsat5 | TM | 1987-9-21 | 2 | 30 |
| Landsat5 | TM | 1997-10-18 | 2 | 30 |
| Landsat5 | TM | 2007-9-28 | 2 | 30 |
| Landsat8 | OLI | 2017-9-07 | 2 | 30 |
| GDEMV2 | ASTER | 2015 | 4 | 30 |

| Landsat 8  Band description | Wavelength () | Landsat 5  Band description | Wavelength () |
| --- | --- | --- | --- |
| Band 1- Coastal aerosol (30m) | 0.43-0.45 | ---- | ---- |
| Band 2- Blue (30m) | 0.45-0.51 | Band 1- Blue (30m) | 0.45—0.52 |
| Band 3- Green (30m) | 0.53-0.59 | Band 2- Green (30m) | 0.52—0.60 |
| Band 4- Red (30m) | 0.64-0.67 | Band 3- Red (30m) | 0.63-0.59 |
| Band 5- Near infrared (30m) | 0.85-0.88 | Band 4- Near infrared (30m) | 0.76— 0.90 |
| Band 6- Shortwave infrared 1 (30m) | 1.57-1.65 | Band 5- Shortwave infrared 1 (30m) | 1.55—1.75 |
| Band 7- Shortwave infrared 2 (30m) | 2.11-2.29 | Band 6- Long wave infrared (120m) | 10.40 —12.5 |
| Band 8- Panchromatic (15m) | 0.5-0.68 | Band 7- Shortwave infrared 2 (30m) | 2.08 —2.35 |
| Band 9- Cirrus (30m) | 1.36-1.38 | ---- | ---- |
| Band 10- Thermal Infrared 1 (100m) | 10.6-11.19 | ---- | ---- |
| Band 11- Thermal Infrared 2 (100m) | 11.5-12.51 | ---- | ---- |

Table 2 Satellite spectrum parameter table

Note: Band1-band5, band7 of Landsat 5 and band2-band7 of Landsat 8 were selected in this paper.

Table 3 Statistics of characteristic parameters

| ID | name | comments on a form |
| --- | --- | --- |
| 1 | PCA1 | The first component of principal component analysis (PCA) of original remote sensing data |
| 2 | Brightness | The brightness component of tassel HAT transform (TCT) of original remote sensing data |
| 3 | NDVI | Normalized vegetation index |
| 4 | MNDWI | Normalized difference water body index |
| 5 | RED | Red band spectral value of original remote sensing data (can enhance the contrast between vegetation coverage and non vegetation coverage) |
| 6 | NIR | The near-infrared spectral values of the original remote sensing data (the most sensitive to the difference of green plant types, clear water contour, used to enhance the contrast between soil crop and land water) |
| 7 | SI | Bare soil index |
| 8 | IBI | index based build up index |
| 9 | DEM | The land surface elevation data of the ASTER sensor can be downloaded directly from the spatial geographic data cloud website |

Table 4 Landscape classification system of Liaohe River Delta

| Primary classification | Secondary classification | Three level classification | comments on a form |
| --- | --- | --- | --- |
| Natural wetland | waters | River water area |  |
| Shallow waters |  |
| Swamp wetland | reed | Cattail meadow and Swertia meadow are classified as Phragmites australis |
| Suaeda Heteroptera |  |
| Beach | beach land |  |
|  | Bare land | Bare land | Tamarix Swertia meadows and other meadows |
| Constructed wetland | Constructed wetland | Salt fields |  |
| Aquaculture area |  |
| reservoir |  |
| Non wetland | woodland | woodland | Shrub meadow is classified as forest land |
| farmland | Paddy field |  |
| dry land |  |
| Industrial and mining buildings and residential areas | Industrial and mining buildings and residential areas | Including urban villages, industrial and mining, roads, protective levees and areas without buildings and meadows |

Table 5 Statistics of sample number in each year

|  | 1987 year | 1997 year | 2007 year | 2017 year |
| --- | --- | --- | --- | --- |
| Shallow water area | 12 | 13 | 15 | 18 |
| rivers | 38 | 41 | 111 | 126 |
| Suaeda Heteroptera | 42 | 22 | 19 | 33 |
| Reservoir | 10 | 13 | 38 | 18 |
| Beach | 24 | 23 | 23 | 18 |
| Reed | 47 | 36 | 44 | 52 |
| Mountain forest | 51 | 52 | 60 | 40 |
| Dry land | 65 | 66 | 67 | 37 |
| Bare land | 31 | 15 | 29 | 23 |
| Residence community | 71 | 72 | 101 | 110 |
| Paddy field | 27 | 75 | 88 | 91 |
| Breeding area | 36 | 33 | 75 | 34 |
| Salt fields | 25 | 34 | 53 | 21 |
| Total | 479 | 495 | 723 | 621 |

Table 6 Landscape transfer area from 1987 to 1997 (km2 )

|  | Reservoir | Rivers | Salt fields | Aquaculture area | Paddy field | Residential, industrial and mining areas, etc | Bare land | Dry land | Mountain forest | Reeds and meadows | Beach | Suaeda Heteroptera | Shallow sea area |
| --- | --- | --- | --- | --- | --- | --- | --- | --- | --- | --- | --- | --- | --- |
| Reservoir | 31.96 | 0.23 | 0.38 | 0.14 | 0.02 | 0.26 | 0.31 | 0.05 | 1.13 | 0.32 | 0.28 | 0.16 | 0.22 |
| Rivers | 0.01 | 96.54 | 2.38 | 1.55 | 1.56 | 6.4 | 6.87 | 5.13 | 4.35 | 6.74 | 17.6 | 2.98 | 2.74 |
| Salt fields | 0.76 | 3.19 | 219.62 | 14.53 | 9.62 | 5.14 | 25.57 | 2.14 | 0.52 | 11.48 | 13.01 | 7.12 | 2.75 |
| Aquaculture area | 0.54 | 3.02 | 15.82 | 45.75 | 35.25 | 19.74 | 140.09 | 4.83 | 0.81 | 21.6 | 26.52 | 40.94 | 3.21 |
| Paddy field | 0.06 | 3.36 | 15.79 | 9.61 | 1735.45 | 124.13 | 54.88 | 125.61 | 13.31 | 279.36 | 9.63 | 77.05 | 0.46 |
| Residential, industrial and mining areas, etc | 0.23 | 1.79 | 6.5 | 4.26 | 39.9 | 353.74 | 13.47 | 15.98 | 14.75 | 29.6 | 5.78 | 7.97 | 0.16 |
| Bare land | 0.01 | 2.78 | 0.36 | 0.83 | 8.49 | 27.2 | 11.36 | 9.3 | 6.02 | 3.29 | 1.09 | 2.48 | 0 |
| Dry land | 0.04 | 7.08 | 3.44 | 1.5 | 72.64 | 146.22 | 11.76 | 770.54 | 347.49 | 156.85 | 4.57 | 7.49 | 0.18 |
| Mountain forest | 0 | 2.53 | 2.62 | 1.15 | 11.87 | 26.5 | 2.56 | 50.19 | 356.77 | 18.41 | 2.19 | 3.65 | 0.14 |
| Reeds and meadows | 0.47 | 12.22 | 31.41 | 10.72 | 20.74 | 22.15 | 29.75 | 44.48 | 9.53 | 751.46 | 10.59 | 59.25 | 3.94 |
| Beach | 0.09 | 12.75 | 3.31 | 1.15 | 0.52 | 0.39 | 21.11 | 0.15 | 0.02 | 0.91 | 219.89 | 8.9 | 10.23 |
| Suaeda Heteroptera | 0.05 | 1.49 | 1.6 | 0.28 | 0.64 | 0.36 | 12.13 | 0.19 | 0.11 | 4.4 | 4.59 | 9.15 | 0.22 |
| Shallow sea area | 0.45 | 8.52 | 1.97 | 0.15 | 0.01 | 0.09 | 0.52 | 0.01 | 0.03 | 0.02 | 89.75 | 0.34 | 4539.15 |

Table 7 Landscape transfer area from 1997 to 2007 (km2 )

|  | Reservoir | Rivers | Salt fields | Aquaculture area | Paddy field | Residential, industrial and mining areas, etc | Bare land | Dry land | Mountain forest | Reeds and meadows | Beach | Suaeda Heteroptera | Shallow sea area |
| --- | --- | --- | --- | --- | --- | --- | --- | --- | --- | --- | --- | --- | --- |
| Reservoir | 33.02 | 1.86 | 5.01 | 2.37 | 3.18 | 2.31 | 0.92 | 0.93 | 0.74 | 8.35 | 0.3 | 0.7 | 0.29 |
| Rivers | 0.3 | 85.76 | 4.31 | 5.89 | 1.79 | 2.89 | 2.78 | 2.95 | 0.92 | 4.17 | 4.39 | 0.91 | 9.2 |
| Salt fields | 0.31 | 2.04 | 205.14 | 17.24 | 9.3 | 5.25 | 1.1 | 0.73 | 0.37 | 4.8 | 3.28 | 0.18 | 2.18 |
| Aquaculture area | 0.42 | 1.14 | 16.7 | 135.16 | 34.01 | 7.3 | 2.49 | 1.68 | 0.95 | 10.38 | 27.08 | 3.37 | 1.72 |
| Paddy field | 0.1 | 2.42 | 9.48 | 41.21 | 2023.11 | 15.85 | 10.27 | 75.41 | 13.17 | 105.18 | 0.42 | 2.33 | 0.12 |
| Residential, industrial and mining areas, etc | 0.49 | 3.19 | 22.2 | 43.48 | 170.73 | 389.31 | 25.06 | 149.63 | 35.23 | 40.73 | 0.96 | 1.26 | 0.15 |
| Bare land | 0.23 | 5.67 | 34.39 | 23.69 | 16.44 | 28.19 | 10.53 | 22.57 | 4.64 | 8.14 | 5.63 | 2.14 | 0.21 |
| Dry land | 0.01 | 6.7 | 0.79 | 1.86 | 67.96 | 15.15 | 10.92 | 923.04 | 104.87 | 15.3 | 0.01 | 0.1 | 0 |
| Mountain forest | 0.02 | 5.57 | 0.46 | 1.26 | 17.19 | 8.36 | 5.98 | 292.59 | 301.88 | 4.89 | 0.02 | 0.03 | 0 |
| Reeds and meadows | 0.07 | 9.03 | 7.01 | 25.37 | 94.46 | 17.42 | 2.04 | 59.38 | 15.16 | 798.74 | 3.21 | 8.2 | 0.11 |
| Beach | 0.14 | 24.02 | 6.93 | 53.01 | 1.75 | 0.92 | 0.42 | 0.3 | 0.14 | 0.69 | 219.12 | 14.07 | 102.47 |
| Suaeda Heteroptera | 0.01 | 5.07 | 1.16 | 5.89 | 8.26 | 1.03 | 0.67 | 0.53 | 0.44 | 5.33 | 8.61 | 1.86 | 0.86 |
| Shallow sea area | 0.32 | 2.37 | 1.83 | 1.66 | 0.34 | 0.08 | 0.01 | 0.02 | 0.03 | 0.01 | 21.74 | 0.06 | 4508.35 |

Table 8 Landscape transfer area from 2007 to 2017 (km2 )

|  | Reservoir | Rivers | Salt fields | Aquaculture area | Paddy field | Residential, industrial and mining areas, etc | Bare land | Dry land | Mountain forest | Reeds and meadows | Beach | Suaeda Heteroptera | Shallow sea area |
| --- | --- | --- | --- | --- | --- | --- | --- | --- | --- | --- | --- | --- | --- |
| Reservoir | 48.03 | 2.55 | 3.12 | 3.02 | 0.92 | 2.13 | 1.15 | 0.28 | 0.08 | 5.82 | 1.32 | 0.63 | 1.65 |
| Rivers | 0.72 | 66.7 | 2.16 | 3.36 | 3.72 | 4.17 | 4.03 | 4.47 | 2.05 | 6.01 | 12.84 | 1.82 | 1.63 |
| Salt fields | 2.61 | 5.15 | 139.78 | 8.36 | 3.85 | 9.96 | 3.74 | 1.28 | 0.79 | 6.47 | 12.9 | 1.65 | 16.25 |
| Aquaculture area | 0.82 | 3.07 | 27.12 | 118.67 | 3.87 | 10.13 | 13.38 | 0.24 | 0.36 | 4.33 | 75.22 | 4.02 | 46.7 |
| Paddy field | 0.73 | 0.82 | 1.77 | 3.65 | 1911.58 | 51.09 | 5.66 | 47.25 | 11.89 | 78.99 | 1.99 | 4.17 | 0.61 |
| Residential, industrial and mining areas, etc | 1.31 | 6.43 | 30.97 | 51.2 | 115.95 | 658.99 | 85.49 | 152.27 | 67.01 | 53.04 | 36.12 | 3.91 | 44.62 |
| Bare land | 0.14 | 1.9 | 18.23 | 8.25 | 5.09 | 7.75 | 10.96 | 27.53 | 13.17 | 4.33 | 6.75 | 0.34 | 19.04 |
| Dry land | 0.11 | 4.03 | 0.69 | 1.16 | 43.84 | 34.38 | 10.36 | 746.21 | 309.52 | 71.56 | 0.52 | 0.58 | 0.59 |
| Mountain forest | 0.04 | 0.73 | 0.6 | 1.24 | 3.14 | 3.88 | 4.27 | 126.22 | 218.86 | 7.78 | 0.3 | 0.12 | 0.27 |
| Reeds and meadows | 4.82 | 8.29 | 15.31 | 30.44 | 205.18 | 98.84 | 19.22 | 40.28 | 14.27 | 794.57 | 20.28 | 16 | 8.03 |
| Beach | 0.01 | 5.54 | 3.27 | 4.42 | 0.17 | 0.4 | 1.87 | 0.09 | 0.02 | 0.86 | 178.8 | 5.3 | 91.72 |
| Suaeda Heteroptera | 0.06 | 0.5 | 6.73 | 1.49 | 1.32 | 0.39 | 1.03 | 0.22 | 0.05 | 3.02 | 11.85 | 0.71 | 3.15 |
| Shallow sea area | 0.59 | 20.55 | 2.11 | 7.13 | 0.36 | 0.27 | 1.31 | 0.15 | 0.09 | 3.42 | 65.11 | 0.45 | 4302.51 |
